# Supplementary material for: Application of Crude Pomace Powder of Chokeberry, Bilberry, and Elderberry as a Coloring Foodstuff
Source: MDPI journal article supplement (doi:10.3390/molecules26092689), 2021-05-04
Supplement: s1 [file s1]

**Table S1.** Dry matter (%) of the raw material (untreated berry pomace) and the mass balance (kg) for the drying and milling process of the three berry pomaces with corresponding residual moisture content (%) of the dried pomace as well as the total anthocyanin content (mg Cya-Glc eq./100 g dw) of the untreated berry pomace.

|                                                                         | <b>chokeberry</b> | <b>bilberry</b>  | <b>elderberry</b> |
|-------------------------------------------------------------------------|-------------------|------------------|-------------------|
| dry matter content of untreated pomace (%)                              | 54.63 ± 2.54      | 50.58 ± 0.99     | 57.07 ± 0.89      |
| dry matter content of dried pomace (%)                                  | 95.24 ± 1.52      | 93.31 ± 1.84     | 92.81 ± 0.94      |
| amount of untreated pomace (kg)                                         | 5.23              | 4.52             | 7.23              |
| amount of powder from seedless fraction (kg)                            | 0.50              | 0.23             | 0.17              |
| total anthocyanin content of untreated pomace (mg Cya-Glc eq./100g dw)* | 2188.13 ± 177.42  | 1966.79 ± 121.97 | 196.72 ± 6.36     |

\*: preliminary experiments showed no considerable degradation of anthocyanins during the drying process.

**Table S2.** Total anthocyanin content (g Cya-Glc eq./100 g dw) of the reference substances for PP storage experiments, namely XAD7 extracts of chokeberry and bilberry and their corresponding purified anthocyanins.

|                         | total anthocyanin content (g Cya-Glc eq./100 g dw) |        |
|-------------------------|----------------------------------------------------|--------|
|                         | day 0                                              | day 28 |
| bilberry XAD7 extract   | 22.32                                              | 43.65  |
| bilberry anthocyanins   | 49.49                                              | 79.24  |
| chokeberry XAD7 extract | 6.75                                               | 8.07   |
| chokeberry anthocyanins | 26.68                                              | 23.57  |

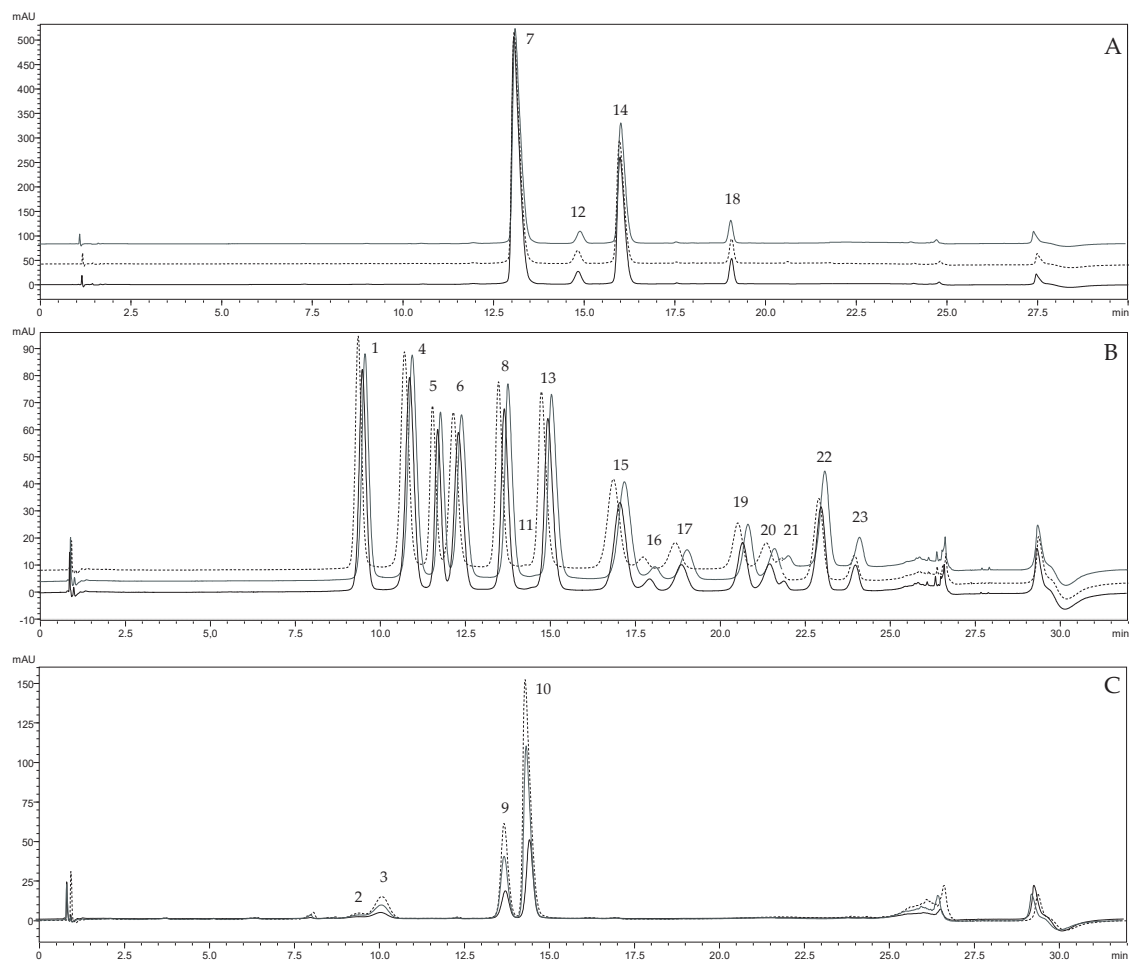

| no | compound        | ret time | reference |
|----|-----------------|----------|-----------|
| 1  | Del-3-gal       | 9,505    | [43]      |
| 2  | Cya-3-sam-5-glu | 9,532    | [44]      |
| 3  | Cya-3,5-diglu   | 10,177   | [44]      |
| 4  | Del-3-glu       | 10,902   | [43]      |
| 5  | Cya-3-gal       | 11,737   | [43]      |
| 6  | Del-3-ara       | 12,343   | [43]      |
| 7  | Cya-3-gal       | 13,160   | [44]      |
| 8  | Cya-3-glu       | 13,702   | [43]      |
| 9  | Cya-3-sam       | 13,816   | [44]      |
| 10 | Cya-3-glu       | 14,480   | [44]      |
| 11 | Pet-3-gal       | 14,547   | [43]      |
| 12 | Cya-3-glu       | 14,947   | [44]      |
| 13 | Cya-3-ara       | 14,963   | [43]      |
| 14 | Cya-3-ara       | 16,074   | [44]      |
| 15 | Pet-3-glu       | 17,085   | [43]      |
| 16 | Peo-3-gal       | 17,976   | [43]      |
| 17 | Pet-3-ara       | 18,915   | [43]      |
| 18 | Cya-3-xyl       | 19,105   | [44]      |
| 19 | Peo-3-glu       | 20,719   | [43]      |
| 20 | Mal-3-gal       | 21,509   | [43]      |
| 21 | Peo-3-ara       | 21,920   | [43]      |
| 22 | Mal-3-glu       | 23,019   | [43]      |
| 23 | Mal-3-ara       | 24,038   | [43]      |

**Figure S1.** UHPLC-DAD chromatogram (520 nm) of the pomace or pomace powder extracts: (A) chokeberry, (B) bilberry, and (C) elderberry from the untreated pomace (black line), the pomace powder on day 0 (grey line), and on day 28 (dotted line). Peak classification is shown in the Table.

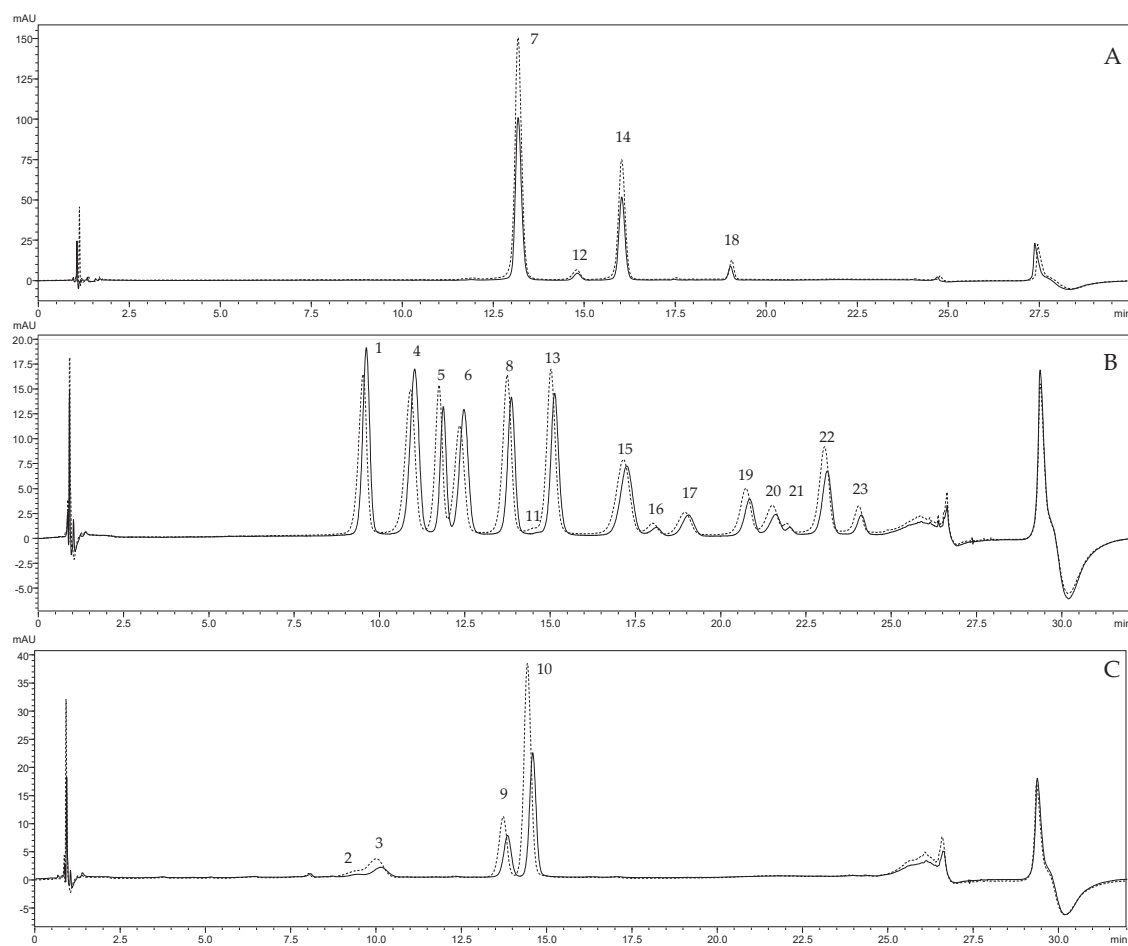

| no | compound        | ret time | reference |
|----|-----------------|----------|-----------|
| 1  | Del-3-gal       | 9,505    | [43]      |
| 2  | Cya-3-sam-5-glu | 9,532    | [44]      |
| 3  | Cya-3,5-diglu   | 10,177   | [44]      |
| 4  | Del-3-glu       | 10,902   | [43]      |
| 5  | Cya-3-gal       | 11,737   | [43]      |
| 6  | Del-3-ara       | 12,343   | [43]      |
| 7  | Cya-3-gal       | 13,160   | [44]      |
| 8  | Cya-3-glu       | 13,702   | [43]      |
| 9  | Cya-3-sam       | 13,816   | [44]      |
| 10 | Cya-3-glu       | 14,480   | [44]      |
| 11 | Pet-3-gal       | 14,547   | [43]      |
| 12 | Cya-3-glu       | 14,947   | [44]      |
| 13 | Cya-3-ara       | 14,963   | [43]      |
| 14 | Cya-3-ara       | 16,074   | [44]      |
| 15 | Pet-3-glu       | 17,085   | [43]      |
| 16 | Peo-3-gal       | 17,976   | [43]      |
| 17 | Pet-3-ara       | 18,915   | [43]      |
| 18 | Cya-3-xyl       | 19,105   | [44]      |
| 19 | Peo-3-glu       | 20,719   | [43]      |
| 20 | Mal-3-gal       | 21,509   | [43]      |
| 21 | Peo-3-ara       | 21,920   | [43]      |
| 22 | Mal-3-glu       | 23,019   | [43]      |
| 23 | Mal-3-ara       | 24,038   | [43]      |

**Figure S2.** UHPLC-DAD chromatogram (520 nm) of yoghurt applications fortified with 2% (*w/w*) pomace powder: (A) chokeberry, (B) bilberry, and (C) elderberry on day 0 (black line), and on day 14 (dotted line). Peak classification is shown in the Table.
